# Supplementary material for: Optimization of amino acid replacement costs by mutational pressure in bacterial genomes
Source: PubMed Central journal article supplement (PMC5430830; doi:10.1038/s41598-017-01130-7), 2017-04-21

## **Supplementary information**

### **Optimization of amino acid replacement costs by mutational pressure in bacterial genomes**

Paweł Błazej, Dorota Mackiewicz, Małgorzata Grabińska, Małgorzata Wnętrzak, Paweł Mackiewicz

**Table S1.** Characteristics of genomes and their protein-coding genes used in the study.

| Genome                                                                                                                                   | Accession number                                                 | Number of genes on strand |         | Total gene length on strand [bp] |           |
|------------------------------------------------------------------------------------------------------------------------------------------|------------------------------------------------------------------|---------------------------|---------|----------------------------------|-----------|
|                                                                                                                                          |                                                                  | leading                   | lagging | leading                          | lagging   |
| <i>Bacillus cereus</i> ATCC 10987, ATCC 14579, E33L, <i>B. anthracis</i> str. Ames; <i>B. thuringiensis</i> serovar konkukian str. 97-27 | NC_003909, NC_004722, NC_006274, NC_003997, NC_005957            | 19,673                    | 6,737   | 16,711,590                       | 5,187,789 |
| <i>Borrelia burgdorferi</i> B31                                                                                                          | NC_001318                                                        | 333                       | 141     | 356,034                          | 173,796   |
| <i>Chlamydia muridarum</i> Nigg                                                                                                          | NC_002620                                                        | 512                       | 407     | 539,778                          | 436,323   |
| <i>Chlamydia trachomatis</i> D/UW-3/CX                                                                                                   | NC_000117                                                        | 507                       | 395     | 513,497                          | 434,802   |
| <i>Escherichia coli</i> str. K-12 substr. MG1655, O157:H7 str. Sakai, CFT073, 042                                                        | NC_000913, NC_002695, NC_004431, NC_017626                       | 11,198                    | 8,577   | 10,375,123                       | 7,799,045 |
| <i>Neisseria gonorrhoeae</i> FA 1090; <i>N. meningitidis</i> serogroup A strain Z2491, 8013, MC58, serogroup C FAM18                     | NC_002946, NC_003116, NC_017501, NC_003112, NC_008767            | 5,529                     | 4,308   | 4,818,080                        | 3,932,314 |
| <i>Rickettsia prowazekii</i> Madrid E; <i>R. typhi</i> Wilmington; <i>R. felis</i> URRWXCal2; <i>R. conorii</i> Malish 7                 | NC_000963, NC_006142, NC_007109, NC_003103                       | 2,688                     | 1,764   | 2,364,246                        | 1,588,938 |
| <i>Staphylococcus aureus</i> N315, MRSA252, COL                                                                                          | NC_002745, NC_002952, NC_002951                                  | 5,908                     | 1,933   | 5,497,047                        | 1,547,097 |
| <i>Streptococcus pyogenes</i> SF370, SSI-1, MGAS8232, MGAS6180, MGAS315, MGAS10394                                                       | NC_002737, NC_004606, NC_003485, NC_007296, NC_004070, NC_006086 | 8,834                     | 2,193   | 7,895,787                        | 1,803,942 |

**Table S2.** Number of cases, in which an empirical matrix from a genome was located closest to the given Pareto front of matrices maximizing one and minimizing other parameter (MaxMin and MinMax) as well as maximizing (Max) or minimizing (Min) both parameters.

| <b>Genome</b>                 | <b>Max</b> | <b>MaxMin</b> | <b>MinMax</b> | <b>Min</b> |
|-------------------------------|------------|---------------|---------------|------------|
| <i>Bacillus</i> species       | 0          | 15            | 15            | 12         |
| <i>Borrelia burgdorferi</i>   | 0          | 12            | 29            | 1          |
| <i>Chlamydia muridarum</i>    | 0          | 19            | 5             | 18         |
| <i>Chlamydia trachomatis</i>  | 0          | 21            | 6             | 15         |
| <i>Escherichia coli</i>       | 0          | 27            | 6             | 9          |
| <i>Neisseria</i> species      | 0          | 20            | 7             | 15         |
| <i>Rickettsia</i> species     | 0          | 13            | 21            | 8          |
| <i>Staphylococcus aureus</i>  | 0          | 16            | 22            | 4          |
| <i>Streptococcus pyogenes</i> | 0          | 19            | 9             | 14         |

**Table S3.** Number of cases, in which an empirical matrix for a pair of amino acid properties was located closest to the given Pareto front of matrices maximizing one and minimizing other parameter (MaxMin and MinMax) as well as maximizing (Max) or minimizing (Min) both parameters.

| Properties           | Max | MaxMin | MinMax | Min |
|----------------------|-----|--------|--------|-----|
| alfa-beta            | 0   | 0      | 2      | 16  |
| alfa-Grantham        | 0   | 1      | 3      | 14  |
| alfa-hydrophathy     | 0   | 0      | 3      | 15  |
| alfa-Miyata          | 0   | 0      | 3      | 15  |
| alfa-Mohana          | 0   | 9      | 5      | 4   |
| alfa-polarity        | 0   | 3      | 7      | 8   |
| beta-Grantham        | 0   | 12     | 6      | 0   |
| beta-hydrophathy     | 0   | 17     | 1      | 0   |
| beta-Miyata          | 0   | 13     | 5      | 0   |
| beta-Mohana          | 0   | 7      | 5      | 6   |
| beta-polarity        | 0   | 7      | 4      | 7   |
| Grantham-hydrophathy | 0   | 1      | 17     | 0   |
| Grantham-Miyata      | 0   | 0      | 18     | 0   |
| Grantham-Mohana      | 0   | 14     | 4      | 0   |
| Grantham-polarity    | 0   | 6      | 8      | 4   |
| hydrophathy-Miyata   | 0   | 17     | 1      | 0   |
| hydrophathy-Mohana   | 0   | 9      | 5      | 4   |
| hydrophathy-polarity | 0   | 17     | 1      | 0   |
| Miyata-Mohana        | 0   | 15     | 2      | 1   |
| Miyata-polarity      | 0   | 10     | 6      | 2   |
| Mohana-polarity      | 0   | 4      | 14     | 0   |

**Table S4.** Mean relative minimal distances of empirical matrices from bacterial genomes to respective Pareto fronts of matrices maximizing one and minimizing other parameter (MaxMin & MinMax) as well as maximizing (Max) or minimizing (Min) both parameters. Max/Min is an average ratio of the minimal distances to Max and Min Pareto fronts.

| <b>Genome</b>                 | <b>Max</b> | <b>MaxMin</b> | <b>MinMax</b> | <b>Min</b> | <b>Max/Min</b> |
|-------------------------------|------------|---------------|---------------|------------|----------------|
| <i>Bacillus</i> species       | 0.579      | 0.136         | 0.113         | 0.171      | 4.26           |
| <i>Borrelia burgdorferi</i>   | 0.557      | 0.130         | 0.084         | 0.230      | 2.61           |
| <i>Chlamydia muridarum</i>    | 0.493      | 0.118         | 0.201         | 0.188      | 3.55           |
| <i>Chlamydia trachomatis</i>  | 0.475      | 0.115         | 0.197         | 0.213      | 3.23           |
| <i>Escherichia coli</i>       | 0.405      | 0.107         | 0.186         | 0.302      | 1.82           |
| <i>Neisseria</i> species      | 0.454      | 0.130         | 0.204         | 0.212      | 3.13           |
| <i>Rickettsia</i> species     | 0.572      | 0.148         | 0.097         | 0.182      | 3.38           |
| <i>Staphylococcus aureus</i>  | 0.608      | 0.124         | 0.091         | 0.177      | 3.77           |
| <i>Streptococcus pyogenes</i> | 0.590      | 0.112         | 0.141         | 0.157      | 4.49           |

**Table S5.** Mean relative minimal distances of empirical matrices for a pair of amino acid properties to respective Pareto fronts of matrices maximizing one and minimizing other parameter (MaxMin and MinMax) as well as maximizing (Max) or minimizing (Min) both parameters. Max/Min is an average ratio of the minimal distances to Max and Min Pareto fronts.

| <b>Properties</b>    | <b>Max</b> | <b>MaxMin</b> | <b>MinMax</b> | <b>Min</b> | <b>Max/Min</b> |
|----------------------|------------|---------------|---------------|------------|----------------|
| alfa-beta            | 0.271      | 0.312         | 0.279         | 0.295      | 2.12           |
| alfa-Grantham        | 0.339      | 0.275         | 0.245         | 0.260      | 2.59           |
| alfa-hydrophathy     | 0.282      | 0.285         | 0.312         | 0.299      | 2.61           |
| alfa-Miyata          | 0.335      | 0.276         | 0.259         | 0.268      | 2.70           |
| alfa-Mohana          | 0.393      | 0.134         | 0.267         | 0.200      | 2.67           |
| alfa-polarity        | 0.277      | 0.192         | 0.325         | 0.259      | 1.93           |
| beta-Grantham        | 0.535      | 0.064         | 0.086         | 0.075      | 2.03           |
| beta-hydrophathy     | 0.611      | 0.036         | 0.056         | 0.046      | 2.34           |
| beta-Miyata          | 0.550      | 0.054         | 0.085         | 0.069      | 2.10           |
| beta-Mohana          | 0.559      | 0.109         | 0.131         | 0.120      | 4.95           |
| beta-polarity        | 0.593      | 0.119         | 0.139         | 0.129      | 5.54           |
| Grantham-hydrophathy | 0.591      | 0.084         | 0.058         | 0.071      | 2.47           |
| Grantham-Miyata      | 0.643      | 0.040         | 0.021         | 0.030      | 2.38           |
| Grantham-Mohana      | 0.636      | 0.074         | 0.099         | 0.087      | 3.94           |
| Grantham-polarity    | 0.599      | 0.107         | 0.121         | 0.114      | 4.12           |
| hydrophathy-Miyata   | 0.604      | 0.044         | 0.083         | 0.063      | 2.57           |
| hydrophathy-Mohana   | 0.626      | 0.082         | 0.110         | 0.096      | 4.87           |
| hydrophathy-polarity | 0.652      | 0.075         | 0.124         | 0.100      | 4.96           |
| Miyata-Mohana        | 0.650      | 0.070         | 0.091         | 0.081      | 4.31           |
| Miyata-polarity      | 0.625      | 0.098         | 0.116         | 0.107      | 4.63           |
| Mohana-polarity      | 0.669      | 0.085         | 0.058         | 0.071      | 4.72           |

**Fig. S1.** Nucleotide substitution rates for empirical matrices (emp) as well as matrices that minimized (min) and maximized (max) hydrophobicity and polarity costs of amino acid replacements, separately for leading (lead) and lagging (lagg) strands. The thick horizontal lines indicate median, the coloured boxes show quartile range and the whiskers determine the range without outliers.

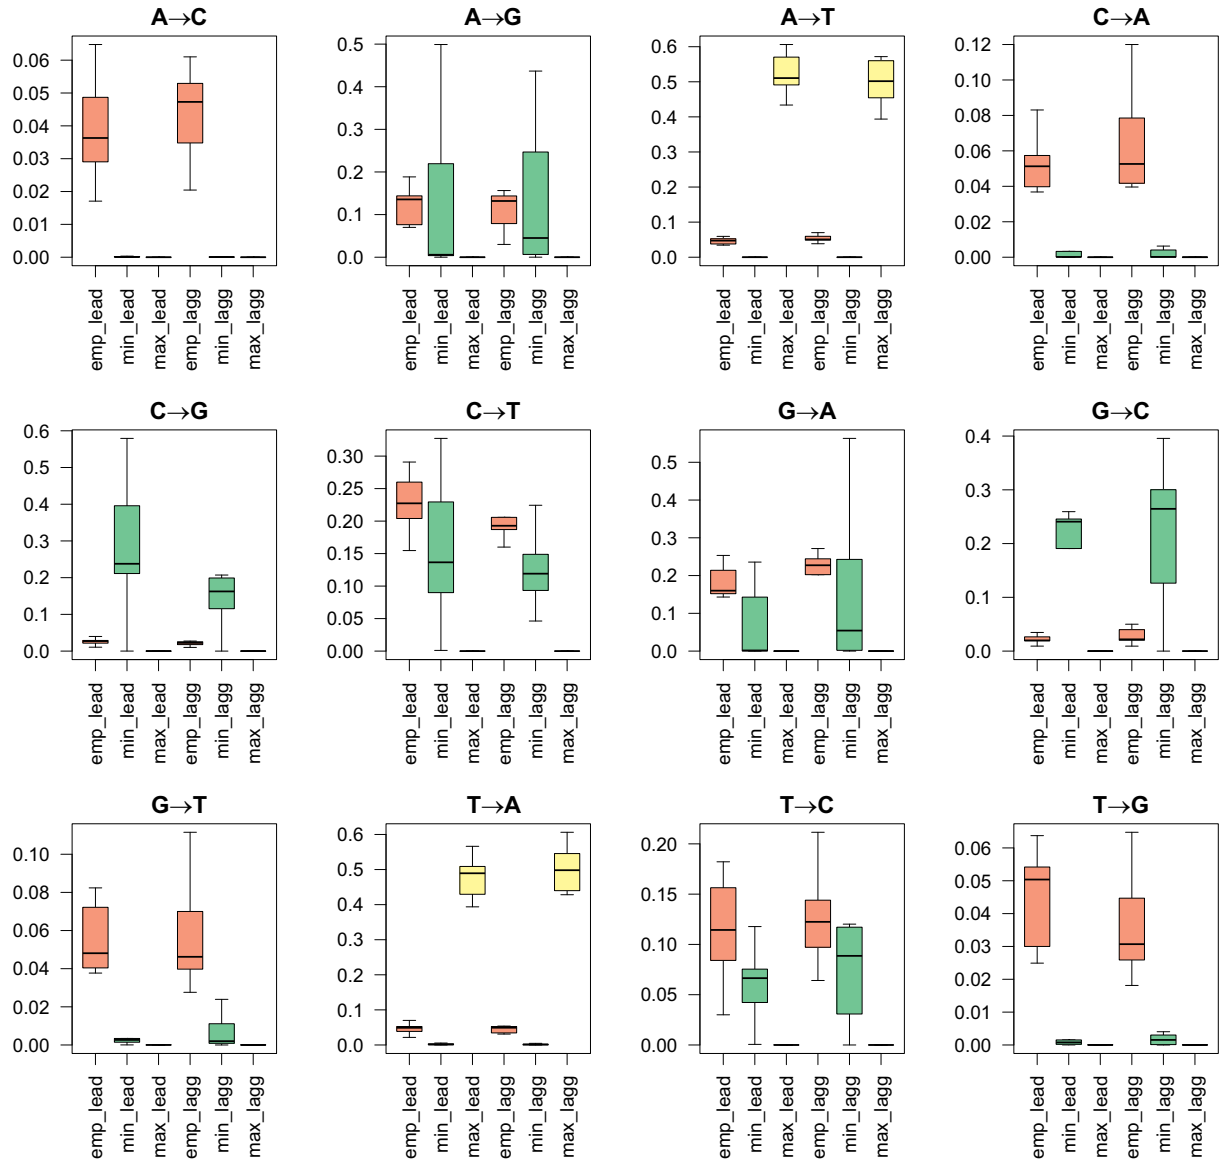

**Fig. S2.** Nucleotide substitution rates for empirical matrices (emp) as well as matrices that minimized (min) and maximized (max) various physicochemical costs of amino acid replacements, separately for leading (lead) and lagging (lagg) strands. The thick horizontal lines indicate median, the coloured boxes show quartile range and the whiskers determine the range without outliers.

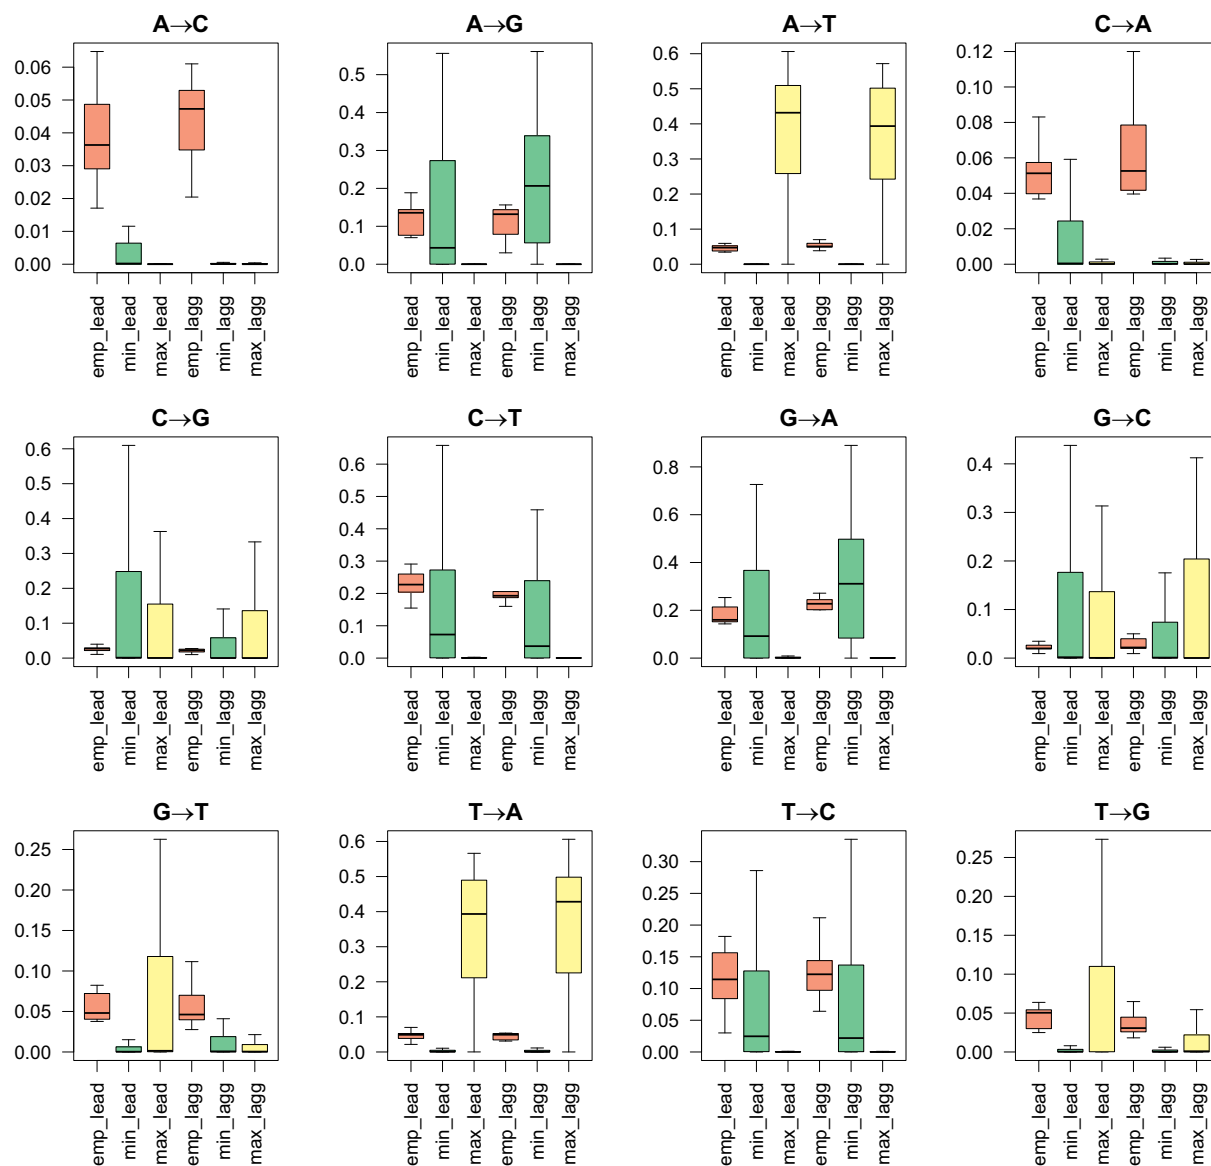

Supplement: 41598_2017_1130_MOESM1_ESM.pdf [file 41598_2017_1130_MOESM1_ESM.pdf]
